# Supplementary material for: The Effect of Growth Hormone Administration on the Regulation of Mitochondrial Apoptosis in-Vivo
Source: MDPI journal article supplement (doi:10.3390/ijms160612753), 2015-06-05
Supplement: s1 [file s1]

## Supplementary Information

**Table S1.** Pearson's correlational co-efficients of cytosolic associated miRNA fold changes in expression against mRNA/Protein fold changes in expression for the corresponding gene of interest in placebo and rhGH treated groups.

| Cytosolic miRNA |               | Placebo                | GH                     |
|-----------------|---------------|------------------------|------------------------|
| miR-181a        | Bcl-2 mRNA    | 0.411 ( $p = 0.080$ )  | 0.402 ( $p = 0.088$ )  |
|                 | Bcl-2 Protein | -0.108 ( $p = 0.650$ ) | -0.217 ( $p = 0.372$ ) |
| miR-125b        | Bak mRNA      | 0.345 ( $p = 0.137$ )  | -0.115 ( $p = 0.638$ ) |
|                 | Bak Protein   | 0.162 ( $p = 0.495$ )  | 0.052 ( $p = 0.834$ )  |

**Table S2.** Pearson's correlational co-efficients of mitochondrial associated miRNA fold changes in expression against mRNA/Protein fold changes in expression for the corresponding gene of interest in placebo and rhGH treated groups.

| Mitochondrial miRNA |               | Placebo                | GH                     |
|---------------------|---------------|------------------------|------------------------|
| miR-181a            | Bcl-2 mRNA    | -0.198 ( $p = 0.480$ ) | 0.369 ( $p = 0.131$ )  |
|                     | Bcl-2 Protein | -0.155 ( $p = 0.567$ ) | -0.313 ( $p = 0.207$ ) |
| miR-125b            | Bak mRNA      | -0.079 ( $p = 0.741$ ) | 0.374 ( $p = 0.127$ )  |
|                     | Bak Protein   | -0.220 ( $p = 0.351$ ) | -0.167 ( $p = 0.508$ ) |
